1 A waveform-independent measure of recurrent neural activity

2

3 *Immo Weber*<sup>\*a</sup>, *Carina R. Oehr*<sup>a,b</sup>

4 <sup>a</sup> Department of Neurology, Philipps-University of Marburg, Marburg, Germany

5 <sup>b</sup> Center for Mind, Brain and Behavior (CMBB), Philipps-University Marburg, Marburg, Germany

6

7 \* Corresponding author: [immo.weber@staff.uni-marburg.de](mailto:immo.weber@staff.uni-marburg.de)

8

9 Abstract

10 Rhythmic neural activity, so called oscillations, play a key role for neural information transmission,  
11 processing and storage. Neural oscillations in distinct frequency bands are central to physiological  
12 brain function and alterations thereof have been associated with several neurological and psychiatric  
13 disorders. The most common methods to analyse neural oscillations, e.g. short-term Fourier transform  
14 or wavelet analysis, assume that measured neural activity is composed of a series of symmetric  
15 prototypical waveforms, e.g. sinusoids. However, usually the models generating the signal, including  
16 waveform shapes of experimentally measured neural activity are unknown. Decomposing asymmetric  
17 waveforms of nonlinear origin using these classic methods may result in spurious harmonics visible in  
18 the estimated frequency spectra. Here, we introduce a new method for capturing rhythmic brain  
19 activity based on recurrences of similar states in phase-space. This method allows for a time-resolved  
20 estimation of amplitude fluctuations of recurrent activity irrespective of or specific to waveform-  
21 shapes. The algorithm is derived from the well-established field of recurrence analysis, which has rarely  
22 been adopted in neuroscience. In this paper, we show its advantages and limitations in comparison to  
23 short-time Fourier transform and wavelet convolution using periodic signals of different waveform  
24 shapes. Further, we demonstrate its application using experimental data, i.e. intracranial  
25 electrophysiological recordings from the human motor cortex of one epilepsy patient.

26

27 **Keywords:** oscillations, waveform, recurrence analysis, nonlinear time series analysis, wavelet,  
28 rhythmic neural activity

## 29 Introduction

30

31 During the last two decades, neural oscillations have gained increasing attention as a fundamental

32 mechanism of neural communication (Buehlmann and Deco 2010; Agostina Palmigiano et al. 2017).

33 Neural oscillations are defined as temporally recurring patterns of neuronal activity, also referred to

34 as periodic and rhythmic activity. Oscillations mainly represent synchronized input to neural ensembles

35 consisting of thousands of cells (Buzsáki and Draguhn 2004). The spatial specificity of recorded activity

36 mainly depends on the measurement device used, with e.g. surface electrocorticography covering a

37 much broader scale than e.g. invasive local field potential recordings (LFPs). Classically, oscillatory

38 activity in the human brain is subdivided into five frequency bands: delta (<4 Hz), theta (4-8 Hz), alpha

39 (8-13 Hz), beta (13-30 Hz) and gamma (>30 Hz) (Buzsáki and Draguhn 2004). A wide range of

40 physiological processes in the animal and human brain is associated with fluctuations of oscillations in

41 distinct frequency bands, e.g. such as deep sleep (delta oscillations, Amzica and Steriade 1998), long-

42 term memory and inhibitory top-down control (theta oscillations, Oehrn 2018), attention and local

43 inhibition (alpha oscillations, Bollimunta et al. 2011) and motor control (beta oscillations, Engel and

44 Fries 2010). Further, alterations in distinct frequency bands occur in neurological and psychiatric

45 diseases, e.g. changes in beta band activity during Parkinson's disease (Hemptinne et al. 2013; Kühn et

46 al. 2006; Little and Brown 2014) and theta activity during essential tremor (Pedrosa et al. 2012;

47 Schnitzler et al. 2009). Nowadays, neuroscientists commonly use wavelet analysis for the

48 quantification of oscillatory activity (Hramov et al. 2015; van Vugt et al. 2007) and Fourier-based

49 analysis tools, such as multitapering or short time Fourier transformation (van Drongelen 2018). While

50 being computational efficient, these methods have certain limitations that one needs to consider

51 during interpretation. Classical Fourier and wavelet analysis usually implicitly assume that the

52 analysed signal is a superposition, i.e. summation of stationary sinusoidal or wavelet shaped

53 components. However, Fourier transformation of a non-periodic or non-sinusoidal signal may be

54 difficult to interpret. While it is theoretically possible to deconstruct any non-periodic signal into a

55 series of infinite sinusoidals using the Fourier transform, one has to be careful not to over interpret

56 frequency components which arise due to the decomposition of a non-periodic non-sinusoidal signal  
57 into periodic sinusoidals (Lozano-Soldevilla et al. 2016; Gebber et al. 1999). Thus, the question arises  
58 which frequency components do indeed carry meaningful information, and which are redundant or  
59 even artificial.

60 The rationale behind using Fourier-based methods is the basic assumption, that most  
61 electrophysiologically recorded data, e.g. from electroencephalography (EEG) or LFPs, represent the  
62 summed activity of large neuronal populations (Franaszczuk and Blinowska 1985; Buzsáki and Draguhn  
63 2004). However, despite few attempts at data-driven modelling of specific waveforms (Sherman et al.  
64 2016; Lewis et al. 2012) most often the signal generating mechanisms and models and the prototypical  
65 waveform shapes of neuronal activity are unknown (Cole and Voytek 2017). In recent years, waveform  
66 shapes have gained increasing interest in the neuroscientific community (for reviews see Jones 2016  
67 and Cole and Voytek 2017). Several studies revealed stereotypical variants of classic frequency bands  
68 which deviated from the sinusoidal waveform shape, e.g. the sensorimotor “mu rhythm” which is a  
69 variation of an alpha wave (Arroyo et al. 1993; Debnath et al. 2019; Muthukumaraswamy et al. 2004;  
70 Tiihonen et al. 1989) or motor cortical beta activity with a saw tooth shape (Cole et al. 2017). This non-  
71 sinusoidal rhythmic activity is functionally relevant. In Parkinson’s disease, asymmetric beta waves  
72 have been associated with the pathological state and shown to become more symmetric with  
73 successful treatment i.e. deep brain stimulation (Cole et al. 2017). While waveform shape is  
74 increasingly recognized to carry meaningful physiological information, there is still a lack of tools which  
75 specifically quantify non-sinusoidal activity. While recently, algorithms to characterize waveform  
76 shapes have been proposed, methods to incorporate non-sinusoidal activity into frequency analysis  
77 are still lacking (Cole et al. 2017; Pullon et al. 2019; Escobar Sanabria et al. 2017). Using classic  
78 approaches like Fourier analysis on asymmetric signals leads to the generation of harmonics in the  
79 respective spectra, which can be falsely interpreted as meaningful physiological or pathological  
80 activity. This is particularly true for measures of coupling, e.g. phase-amplitude coupling where non-  
81 sinusoidal signals may lead to spurious results (Lozano-Soldevilla et al. 2016; Yeh et al. 2016).

82 Here, we introduce a parsimonious way to analyse rhythmic activity that is not based on assumptions  
83 regarding waveform shapes. In this approach, we quantify recurrences of similar dynamic states ,based  
84 on the established framework of recurrence analysis (Webber and Marwan 2015). We derive a new  
85 algorithm for the estimation of a time-resolved recurrence amplitude spectrum and demonstrate its  
86 advantages and limitations in comparison to classic approaches, in particular in regard to non-  
87 sinusoidal signals. For this purpose, we use artificial data with known ground truth, as well as real  
88 intracranial brain recordings from the human motor cortex of one epilepsy patient.

89

## 90 Methods

91

### 92 1. Basic definitions

93 For the remainder of this paper, let  $x_t$  be the realizations of stochastic variables  $X_t$  at time  $t$  generating  
94 a stochastic process  $X$ . Normal case letters indicate scalar valued observations, while bold letters  
95 indicate  $d$ -dimensional vector valued states. A state is defined as a collection of past mostly  
96 independent or temporally uncorrelated variables  $X_{t-\Delta t}$ , which are sufficient to predict the present  
97 observation  $X_t$ . States can be reconstructed using Taken's delay embedding theorem (Takens 1981) by  
98 time shifting the scalar time series  $X$  ( $d-1$ ) times by a factor  $\tau=\Delta t$ .

$$\mathbf{x}_t^{d_x} = [X_{t-(d_x-1)\tau}, X_{t-(d_x-2)\tau}, \dots, X_{t-\tau}, X_t]^T, \quad (1)$$

99 with  $T$  indicating the transpose of the vector. The dimension  $d$  represents the minimum number of  
100 degrees of freedom necessary to sufficiently describe the process  $X$ .

101 The collection of all realized states  $\mathbf{x}_t$  is defined as the state-space of process  $X$ . For example, a  
102 perturbed frictionless pendulum creates a closed trajectory in a two-dimensional phase-space spanned  
103 by the variables position and velocity (Figure 1). The coloured dots in Figure 1B correspond to the  
104 pendulum positions shown in Figure 1A.

105

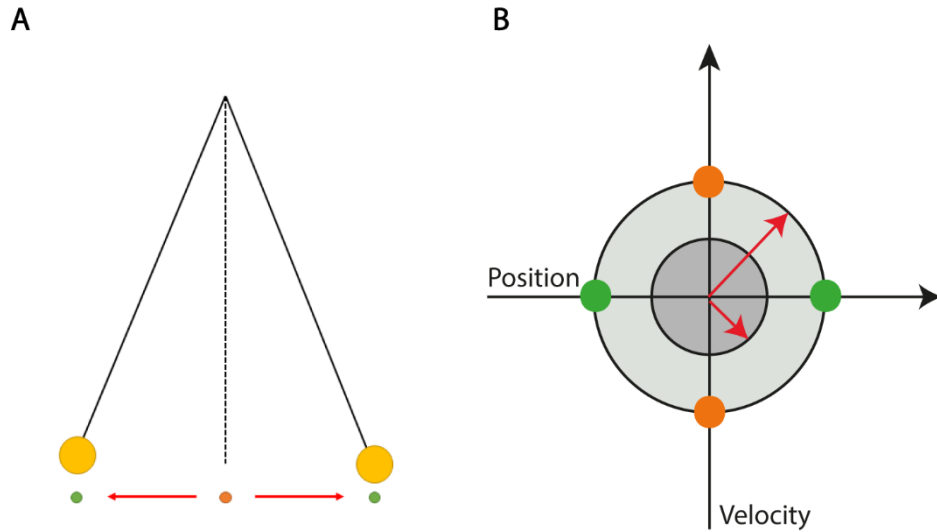

106

107 **Fig. 1: Example of a periodic phase-space representation.** A: A frictionless pendulum perturbed from its resting  
 108 position (orange) to a new position with small amplitude (green). B: Phase-space representation of the pendulum  
 109 with two different amplitudes (grey-shaded circles). The state of the pendulum is uniquely determined by its  
 110 momentary position and velocity. Colored circles in b correspond to the positions shown in a. Lengths of the red  
 111 arrows indicate the absolute amplitudes for both phase-space representations.

112

113 Assuming the process  $X$  to be Markovian, i.e. stochastic with finite memory, the dimension  $d$  and the  
 114 delay  $\tau$  can be reconstructed from univariate time series using Ragwitz criterion (Ragwitz and Kantz  
 115 2002) or a combination of the false nearest neighbour algorithm (Hegger and Kantz 1999) and the  
 116 auto-mutual information (Fraser and Swinney 1986) (for details see Supplement).

117 2. Quantification of recurrent states

118

119 2.1 Frequency estimation: the recurrence period

120 A state  $\mathbf{x}_{t+\Delta t}$  is defined to be recurrent after  $\Delta t$  time steps, if it is within a neighbourhood  $U_\varepsilon$  of  $X_t$  with  
 121 radius  $\varepsilon$  (Eckmann et al. 1987):

$$\mathbf{x}_{t+\Delta t}^{d_x} \in U_\varepsilon(\mathbf{x}_t^{d_x}) \quad (2)$$

122 For infinitely small neighbourhoods, i.e.  $\varepsilon \rightarrow 0$ ,  $\mathbf{x}_{t+\Delta t}$  is periodic with period  $\Delta t$  (Little et al. 2007). All  
123 recurrences of an arbitrarily high dimensional phase-space may be represented by calculating a two-  
124 dimensional binary recurrence matrix (Eckmann et al. 1987):

$$M_{t,t+\Delta t} = \Theta(\varepsilon - \|\mathbf{x}_t - \mathbf{x}_{t+\Delta t}\|) \quad (3)$$

125  $\Theta$  is the Heaviside step function and  $\|\cdot\|$  is the Euclidean distance norm:

$$\|\mathbf{x}_t - \mathbf{x}_{t+\Delta t}\| = \sqrt{\sum_{i=1}^{d_x} (x_{i,t} - x_{i,t+\Delta t})^2}, \quad (4)$$

126 where  $i$  are the components of phase-space vectors. If  $(\varepsilon - \|\mathbf{x}_t - \mathbf{x}_{t+\Delta t}\|)$  is negative  $\Theta$  is 0 else 1. This  
127 recurrence matrix  $M$  can be graphically represented by a recurrence plot, where each black dot  
128 represents one recurrence of time  $i$  at time  $j$  (Figure 2).

129 Depending on the system's local dynamics, the recurrence plot depicts different motifs. Parallel  
130 diagonal lines indicate periodicity and determinism while vertical lines appear due to laminar, i.e.  
131 unchanging behavior. White corners arise because of slow drifts or non-stationarity and isolated dots  
132 most often indicate stochastic behavior (Eckmann et al. 1987). The recurrence period  $T$  of any closest  
133 temporal neighbor  $\mathbf{x}_{t+\Delta t}$  of  $\mathbf{x}_t$  within a spatial neighbourhood  $U_\varepsilon$  may be estimated as the difference  
134 (Little et al. 2007):

$$T = (t + \Delta t - \rho) - (t + \gamma), \quad (5)$$

135 where  $\gamma$  is the difference in samples between  $\mathbf{x}_t$  and  $\mathbf{x}_t$  first leaving  $U_\varepsilon$  and  $\rho$  is the sample difference  
136 between  $\mathbf{x}_t$  reentering  $U_\varepsilon$  and  $\mathbf{x}_{t+\Delta t}$  (Figure 3A). In the recurrence matrix,  $T$  is equal to the number of  
137 states between vertical line segments starting from the main diagonal in  $M$  (see Figure 2B).

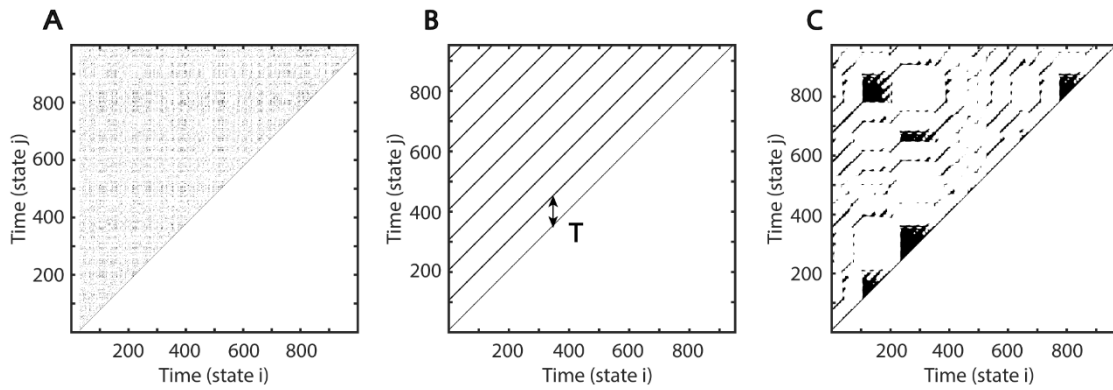

138

139 **Fig. 2: Examples of Recurrence Plots.** At each time  $i$  each black dot indicates a spatial recurrence at time  $j$ . Parallel  
 140 lines indicate periodic activity. Recurrence plots show characteristic patterns depending on the system's  
 141 qualitative dynamics: A: Random white noise. B: Sinusoid with period of 100 samples. C: Recurrence plot of a  
 142 classic deterministic nonlinear system, i.e. the Lorenz system (Lorenz 1963).

143

## 144 2.2. Amplitude estimation

145 As can be seen in Figures 1B and 3A, recurrent systems form closed or nearly closed trajectories in  
 146 phase-space. Here, the energy is contained in the phase-space volume of each recurrent state. In  
 147 reference to our example, the phase-space portrait would increase in size, if the pendulum would be  
 148 moved with a greater amplitude. Thus, a reasonable approximation of the amplitude of each period  
 149 would be to estimate its maximum diameter in phase-space (see red arrows in Figure 1B).

$$\bar{a}_{diam}(T) = \sum_{k=1}^q \max \left\| \mathbf{x}_i - \mathbf{x}_j \right\| * q^{-1}, \forall i, j \in n \quad (6)$$

150 With  $q$  being the number of recurrences per  $T$ , i.e. how often a recurrence of duration  $T$  has occurred  
 151 and  $n$  being the number of samples per recurrence (see Figure 3A).

152 This may be repeated for each recurrent trajectory per recurrence period  $T$  and subsequently averaged  
 153 (Figure 3B).

## 154 2.3. Recurrence probability

155 By estimating the recurrence period  $T$  for all phase-space vectors, it is possible to calculate a histogram  
 156  $R(T)$ , where the bin number is equal to the longest recurrence period  $T_{max}$ . The recurrence probability



157 may thus be estimated by normalizing  $R(T)$  by the total number of recurrences (Figure 3C, Little et al.  
158 2007). As noisy experimental data may lead to a high number of short period recurrences it is useful  
159 to calculate  $P(T)$  for a predefined range of  $T$  ( $T_{min} - T_{max}$ ):

160

$$P(T) = \frac{R(T)}{\sum_{i=T_{min}}^{T_{max}} R(i)}, T = T_{min} \dots T_{max} \quad (7)$$

161

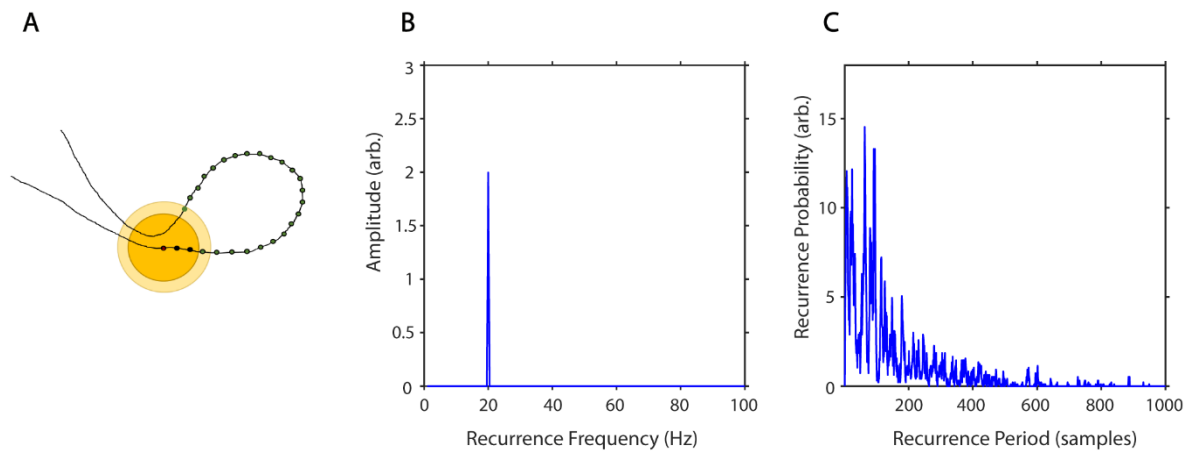

162

163 **Fig. 3: Estimation of recurrence periods.** A: A closed local trajectory in phase-space. A reference point (red) is  
164 tracked in time until it reenters its spatial neighbourhood (examples of two neighbourhoods with different sizes  
165 in yellow). In this example the recurrence period is equal to 23, as it takes 23 samples (green) until the trajectory  
166 reenters the inner neighbourhood (dark yellow). B: Example estimation of recurrence amplitudes using the  
167 maximum norm. Recurrence amplitude of 5 s of a 20 Hz periodic signal with an amplitude of two. C: Example  
168 estimation of recurrence probabilities for a nonperiodic but highly recurrent deterministic system, i.e. the classic  
169 Lorenz system (Lorenz 1963). The plot shows the recurrence probabilities of each period  $T$ .

170

171 Finally, we weight each estimated mean amplitude by its recurrence probability to get an average for  
172 each recurrence frequency bin. This is equivalent to estimating the expected value of the amplitude  
173 for every recurrence frequency:

$$A(T) = R(T) * \bar{a}(T) \quad (8)$$

174

175 Influence of neighbourhood  $\epsilon$  on recurrence estimation

176 The recurrence probability is an estimate of the probability of a recurrence occurring after T time steps.

177 The estimation of P(T) is dependent on  $\epsilon$ . A choice of  $\epsilon$  too small would result in many empty

178 neighborhoods and thus in a high degree of statistical errors. If  $\epsilon$  is chosen too large recurrences are

179 not local anymore and recurrence periods are underestimated. The recurrence period gets

180 approximately underestimated by two samples for every increase of  $\epsilon$  by a multiple q of the sampling

181 period  $f_s$  (e.g. see the light yellow area in Figure 3A):

$$R_{err}(T, \epsilon_{err}) = R(T) - 2q, \quad (9)$$

182 with

$$\frac{\epsilon_{err}}{2} = \frac{\epsilon}{2} + q * \frac{1}{f_s}, \quad (10)$$

183 To better understand the influence of the parameter  $\epsilon$  on recurrences, P(T) may be estimated over a

184 wide range of neighbourhood-sizes, resulting in a spatially-resolved recurrence period spectrum

185 (SREPS). In the SREPS, one would expect to find three regions of interest depending on  $\epsilon$ . For very small

186  $\epsilon$  the SREPS is governed by statistical errors and a uniform distribution across all T. For very high  $\epsilon$  the

187 distribution of P(T) is heavily shifted to small T with only few state vectors leaving and reentering any

188 neighbourhood, with the extreme case of a neighbourhood-size fully engulfing the phase-space. If the

189 signal contains any oscillatory activity slowly shifting but continuous “spectral” peaks occur in the

190 intermediate range of  $\epsilon$ . As stated above the best estimate of the recurrence period may thus be found

191 at the crossing of the continuous spectral peaks and the noise regime for low  $\epsilon$  (Figure 4).

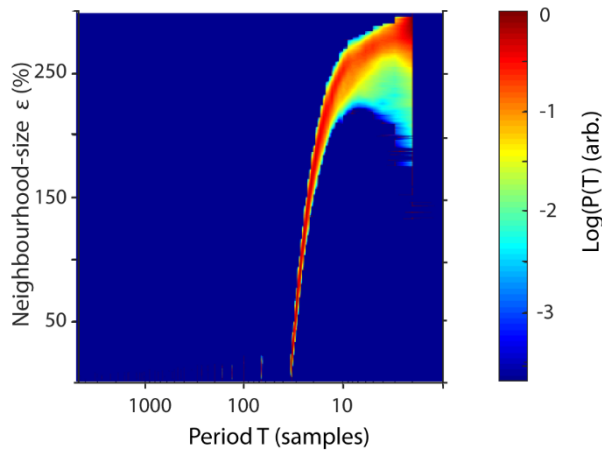

192

193 **Fig. 4: Spatially resolved recurrence probability.** The plot shows recurrence probabilities  $P(T)$  of 50 s of a 3 Hz  
 194 signal as a function of periods  $T=1-5000$  samples and increasing neighbourhood-sizes  $\epsilon=1-300$ .  $\epsilon$  is represented  
 195 in % of the standard deviation of the raw time series.

196

### 197 3. Time-resolved recurrence amplitude

198 In neuroscientific research it is often of interest to analyse spectral activity changes relative to some  
 199 intervention, e.g. some stimulus or response. For this purpose, methods like short-term Fourier or  
 200 Wavelet transform estimate power spectral density as a function of time (Hramov et al. 2015).  
 201 Similarly, the recurrence amplitude spectrum may be estimated for  $n$  short overlapping time windows  
 202  $w_n$  of definite length:

$$P(T, w_n) = \frac{R_*(T, w_n)}{\sum_{i=T_{\min}}^{T_{\max}} R(i, w_n)}, T = T_{\min} \dots T_{\max} \quad (11)$$

203 The length of each time window determines the maximum resolvable recurrence period and should  
 204 thus be chosen with respect to the minimum frequency of interest.

205

206

#### 207 4. Comparison between recurrence estimation, Fourier transform and wavelet transform

208 In Figure 5 we demonstrate the raw (Figure 5A) and weighted recurrence amplitude spectrum (Figure  
209 5B) using an artificial signal of three signals of different concatenated waveform shapes, each with a  
210 length of five seconds, a frequency of 33 Hz and an amplitude of two: 1) a sinusoid, 2) a sawtooth wave  
211 and 3) a rectangle wave. While the frequency resolution succeedingly decreases for the three  
212 waveform types using the raw amplitude spectrum, it stays nearly the same for the weighted  
213 spectrum. However, the amplitude of the rectangle curve is slightly under- and its frequency slightly  
214 overestimated. Using the weighted amplitude spectrum increased the frequency resolution for the  
215 non-sinusoidal signals. For comparison with classic approaches, we analysed the same signal with  
216 short-time Fourier Transform (STFT, Figure 5C) and Wavelet analysis (Figure 5D). For the recurrence  
217 amplitude spectrum and the short-time Fourier spectrum we used 50 % overlapping windows of 600  
218 ms lengths. For Wavelet analysis we used 30 cycles in order to approximate the window length for the  
219 other methods (1s). For STFT and Wavelet analysis, spurious harmonics can be seen for the non-  
220 sinusoidal waveform shapes in addition to the true frequency at 33 Hz. In contrast, the weighted  
221 recurrence amplitude spectrum shows only one spectral peak at a relatively narrow frequency band.

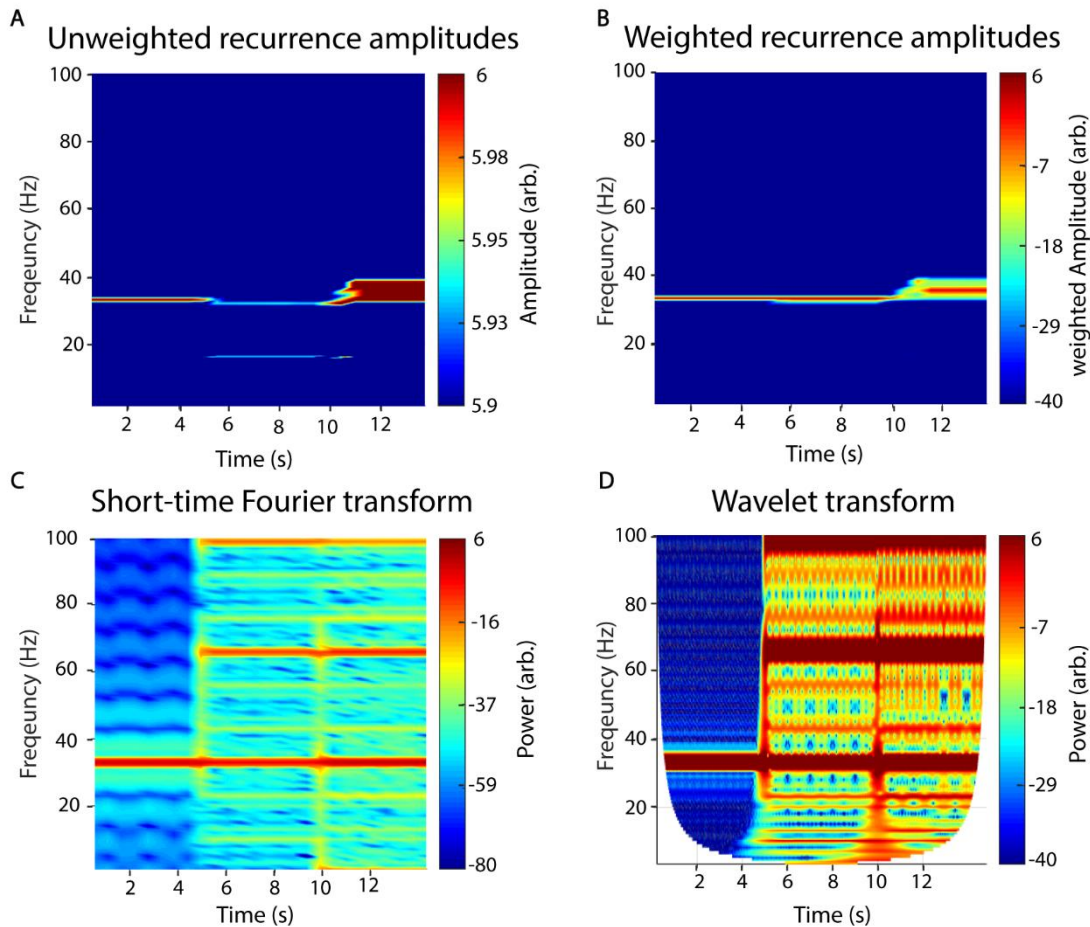

222

223 **Fig. 5: Recurrence amplitude spectrum.** The recurrence amplitude spectrum of a compound signal of three 33

224 Hz oscillatory signals of different shapes is shown. The first five seconds are composed of a sine wave, the next

225 five seconds of a sawtooth wave and the last five seconds of a rectangle wave. A: Raw unweighted amplitudes.

226 B: Raw amplitudes were weighted with their respective probability densities. C: Short-time Fourier transform of

227 the same signal. Window length was set to 1s with 50% overlap. Note the spurious harmonics for the nonlinear

228 waveform shapes, i.e. rectangle (5-10s) and sawtooth shape (10 -15s). D: Wavelet transform of the signal.

229 Wavelet width was set to 18. Note the spurious harmonics for the nonlinear waveform shapes, i.e. rectangle (5-

230 10s) and sawtooth shape (10 -15s).

231

232

233 5. Waveform-specific filter

234 While the proposed estimator is independent of waveform, it is possible to tailor it to distinct  
235 waveform shapes. For this, we introduce a gain factor to the amplitude estimation step which is simply  
236 the Pearson correlation of the waveform shape of each recurrence and a scaled template waveform  $\zeta$ .

$$\bar{a}(T) = \sum_{k=1}^q \max_{i,j} \left| \mathbf{x}_i - \mathbf{x}_j \right| * G^\alpha * q^{-1}, \forall i, j \in n \quad (12)$$

237 With  $\alpha$  being chosen arbitrary and  $G$  being the gain factor:

$$G(k) = \max \left( \frac{\text{cov}(x, \zeta_m)}{\sigma_x \sigma_\zeta^m} \right), m = \zeta_m \dots \zeta_{m+T}, \quad (13)$$

238 with  $\text{cov}$  being the covariance,  $\sigma$  being the variance and  $\zeta_m$  being the template waveform from sample  
239  $m$  to  $m+T$ . For perfectly matching waveforms, the gain is unity and thus the amplitude estimation is  
240 unaffected (Figure 6). In Figure 6 we used the same artificial signal as in Figure 5 and analysed it using  
241 waveform templates of a sinusoid (Figure 6A), sawtooth (Figure 6B) and rectangle shape (Figure 6C),  
242 respectively. The exponent  $\alpha$  determines the strength of the gain factor and thus how much specific  
243 waveform shapes are filtered. In this example, it was set to five.

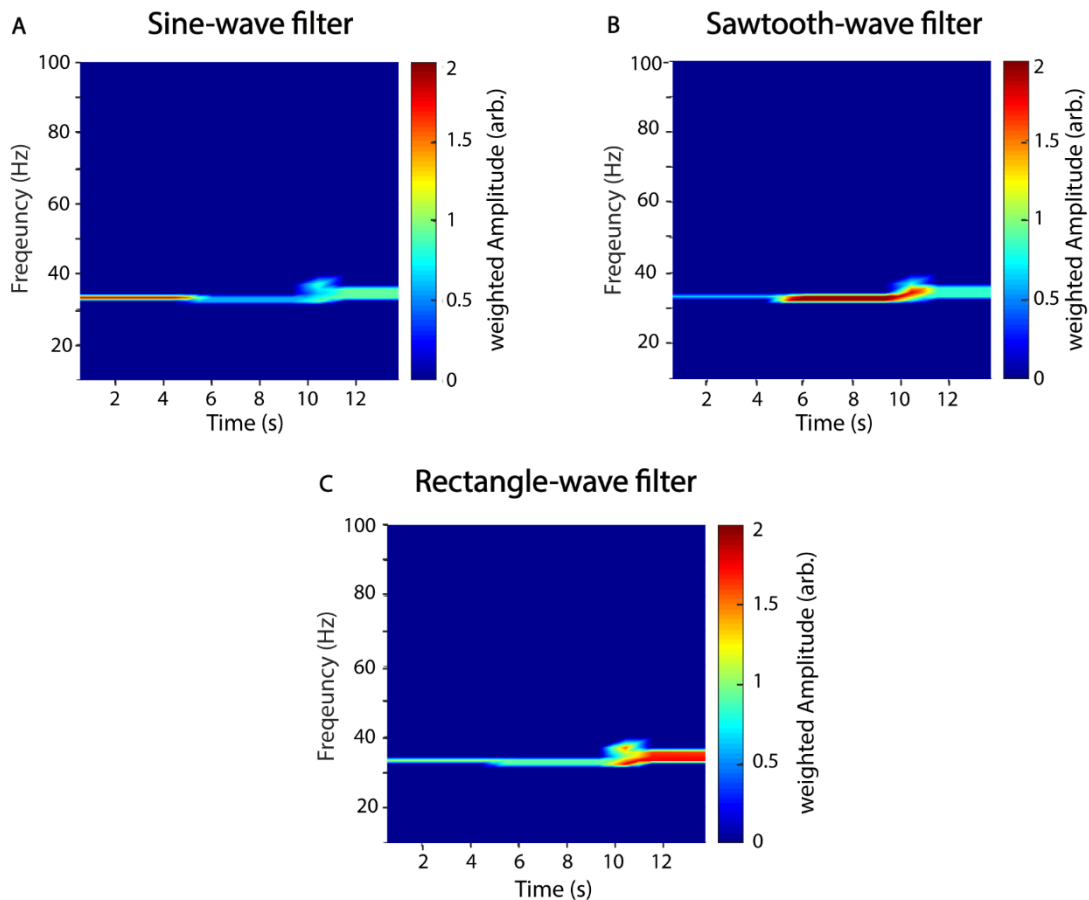

244

245 **Fig. 6: Recurrence amplitude spectrum with templates.** The recurrence amplitude spectrum of a compound  
246 signal of three 33 Hz oscillatory signals of different shapes and a waveform dependent gain is shown. The first  
247 five seconds are composed of a sine wave, the next five seconds of a sawtooth wave and the last five seconds of  
248 a rectangle wave. Shown are the raw unweighted amplitudes. A: Five cycles of a sine wave were used as a shape  
249 template. B: Five cycles of a sawtooth wave were used as a shape template. C: Five cycles of a rectangle wave  
250 were used as a shape template.  $\alpha$  was always set to 5. Window length was set to 1s with 50% overlap.

251

252 Example application

253 While the recurrence amplitude spectrum might be estimated for all types of oscillatory activity, it is  
254 particularly suited for the analysis of electrophysiological neural activity. Thus, we briefly demonstrate  
255 its application using intracranial brain recordings, from the motor cortex of one epilepsy patient. The  
256 patient had received a 48 electrode electrocorticography (ECoG) grid for diagnostic purposes.  
257 Electrodes were localized by co-registration of pre-operative MRI and post-operative CT scans using

258 the Fieldtrip toolbox (Oostenveld et al. 2011) (Figure 7A). As oscillatory activity in the motor cortex  
259 has been well characterized in previous studies, we selected three electrodes located on the precentral  
260 gyrus, i.e. the motor cortex (two medial electrodes in the proximity of the hand area and one lateral  
261 electrode). Anatomical selection was based on the AAL atlas implemented in FieldTrip (Tzourio-  
262 Mazoyer et al. 2002) (Figure 7A). We recorded electrophysiological data by means of the Neurofax-  
263 system of Nihon Kohden (Nihon Kohden, Rosbach, Germany) at a sampling rate of 1000 Hz. The patient  
264 participated in a study where he was asked to press a button on a standard computer keyboard. The  
265 study protocol was approved by the medical ethics committee Marburg and conducted in accordance  
266 with the latest version of the Declaration of Helsinki. To minimize edge effects occurring after  
267 convolution with a wavelet kernel, we segmented the data into relatively large time intervals of two  
268 seconds before until two seconds after response onset and discarded two seconds on each end of the  
269 segment after wavelet convolution. We removed line-noise, visually rejected artifacts and performed  
270 trend correction. We performed a response-locked data analysis, i.e. neural data is analysed time-  
271 locked to the patient's button press. To this end, we used time-recurrence amplitude analysis and  
272 compared results to classic time-frequency analysis, i.e. wavelet convolution, in order to analyse power  
273 in different frequency bands.

274 We used window lengths of 600 samples (=1.67s) and 50% overlap for the time-resolved estimation of  
275 recurrence amplitudes (Figure 7Bi, Ci, Di). Phase-space parameters, i.e. dimension  $d$  and delay  $\tau$  were  
276 optimized for each time window using false nearest-neighbourhood algorithm and auto-mutual  
277 information, respectively. Neighbourhood-size was chosen ad-hoc at 70% of the standard deviation of  
278 each time series. For comparison with classic methods, we used a combined wavelet (for frequencies  
279 3-30 Hz) and multitaper approach (for frequencies above 30 Hz; Figure 7Bii, Cii, Dii), as suggested for  
280 better frequency resolution and frequently adopted in the literature (van Vugt et al. 2007). To this end,  
281 we convolved the data with a continuous complex Morlet wavelet with seven cycles. From the wavelet-  
282 transformed signal, we extracted power values between 3 and 30 Hz in 1 Hz steps (lower frequencies  
283 are difficult to estimate using wavelet convolution in short time windows). For the multi-taper analysis,



284 we used five tapers and a sliding 600 ms time window centered at one ms steps. Both spectra were  
285 normalized, using the complete time-period as baseline. Using wavelet analysis, we found a  
286 desynchronisation around the button press ( $\sim -1 - 0$  ms), ranging across frequency bands delta to beta  
287 ( $\sim 3-32$  Hz) in all three electrodes (Figure 7C*Bii,Cii,Dii*). After the motor response ( $\sim 1$ s post-response),  
288 we observed an enhancement in activity in this broad spectrum approximately one second after the  
289 response. This this so-called rebound activity occurred in a broad frequency range from delta to low  
290 gamma with it being most prominent in the beta band of electrode two. This beta rebound is a well-  
291 described phenomenon in the motor cortex during motor tasks (Crone et al. 1998; Pfurtscheller and  
292 Da Lopes Silva 1999; Jurkiewicz et al. 2006; Miller et al. 2007). Recurrence analysis showed a more  
293 specific beta desynchronisation and rebound for electrodes two, which was also more narrow band.  
294 In contrast to wavelet analysis, we additionally found a broad gamma activation during the button  
295 press, which was most prominently followed by a gamma desynchronisation in electrode two, but also  
296 visible in electrodes one and three to a lesser degree. In contrast, recurrence analysis did hardly reveal  
297 any changes in the theta band. Taken together, recurrence analysis was more sensitive for broad band  
298 high frequency activity that was not detected by wavelet convolution.

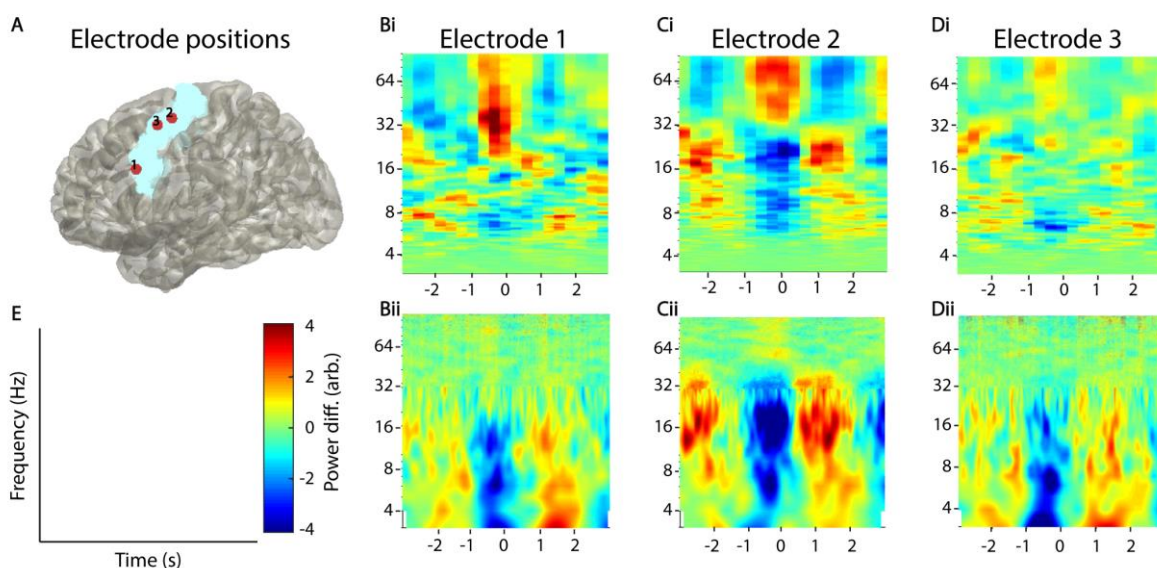

299

300 **Fig. 7: Example application on real invasive EEG data.** A: Selected electrodes in the motor area of one epilepsy  
301 patient. The blue area indicates the precentral gyrus located with the AAL atlas in fieldtrip. Bi, Ci, Di: Recurrence  
302 analysis of three example electrodes. Plots have been convolved with a 5x5 smoothing kernel for visualization  
303 purposes. Bii, Cii, Dii: Corresponding Wavelet analysis of the same electrodes. All power values were normalized  
304 with respect to the total power of the analysed time window.

305 Discussion

306 Here, we introduce a new method to analyse oscillatory activity in neural systems. We validated our  
307 approach with synthetic data and demonstrate its application with real experimental ECoG data of one  
308 epilepsy patient. Using artificial data, we show that the power estimates resulting from our method  
309 are more frequency-specific for non-sinusoidal waveforms and are not associated with spurious  
310 harmonics visible in the estimated frequency spectra. However, by applying specific waveform  
311 templates we demonstrate that our method is also able to detect specific shapes if necessary. Using  
312 human intracranial recordings from the motor cortex of one epilepsy patient, we show that recurrence  
313 analysis compares to conventional methods, such as wavelet analysis and Fourier transformation, in  
314 detecting movement-related oscillatory activity in the motor cortex.

315 With both methods, we found beta desynchronisation in the motor cortex around the button press  
316 followed by beta rebound (Salmelin et al. 1995; Jurkiewicz et al. 2006; Parkes et al. 2006). Both  
317 methods indicate that this effect is spatially specific, as it was most prominent in one of the two medial  
318 electrodes in proximity of the hand area of the primary motor cortex.

319 Further, recurrence analysis was more sensitive for detecting broad band gamma activity that is  
320 thought to represent multi-unit activity rather than narrow-band oscillations (Leszczyński et al. 2020).  
321 Recurrence estimation was seemingly less sensitive for theta and delta oscillations revealed by wavelet  
322 analysis. In contrast to beta activity in electrode two, theta/delta was more broadband in all three  
323 electrodes for wavelet analysis and much more narrowband for recurrence analysis. It is possible that  
324 this activity does not represent true oscillatory or recurrent activity, but rather local nonstationarities  
325 or drifts, which can hardly be detected with recurrence analysis. This is because states of local  
326 nonstationarities, even if they are oscillatory, do not come sufficiently close to each other after the full  
327 period to enter their respective neighbourhoods.

328 Though only meant as a proof-of-principle analysis, this is the first time directly comparing classic  
329 methods (i.e. wavelets and taper) with a recurrence based tool. Despite their fundamental differences  
330 in estimation procedures it is nevertheless evident that both capture recurrent neural activity, which

331 validates both methodological concepts from different angles. However, discussing the mathematical  
332 equivalence of recurrence analysis and classic methods is beyond the scope of this study and should  
333 be analysed in future research.

334 Classically, neural oscillatory activity is analysed using methods derived from Fourier transform. Using  
335 these methods, time series get decomposed into prototypical waveforms or “wavelets” e.g. sinusoids.  
336 While this approach is justified by the understanding that e.g. EEG activity is a summation or  
337 superposition of thousands of synchronously active cells (Buzsáki and Draguhn 2004), interpretation  
338 of spectral estimation may be limited in some cases. This is because the generating models of neural  
339 activity and thus the basal waveform shape is most often unknown. Decomposing an asymmetric or  
340 nonlinear waveform into a series of sinusoids results in an infinite number of spurious harmonics (as  
341 demonstrated in Figure 5C-D), which may be misinterpreted as independent oscillatory activity. Thus,  
342 for such nonlinear signals classic techniques may generate a high degree of redundant information.  
343 Note, however, that wavelet analysis is in theory capable of redundantly quantifying nonsinusoidal  
344 oscillations by applying special mother wavelets e.g. like the Daubechies wavelets (Zhang et al. 2016).  
345 However, one drawback is that using a specific mother wavelet would still restrict analysis to one  
346 specific waveform shape and would also require prior knowledge, while recurrence based methods  
347 may detect unspecified arbitrary shapes. It is also still very uncommon to use any other mother wavelet  
348 than the Morlet wavelet for oscillatory analysis, although few studies exist that used other types to  
349 detect recurring spiking events in the EEG (Milton 1994; Grubov et al. 2017). The problem of  
350 nonsinusoidal waveform shape has been especially demonstrated for connectivity measures i.e. cross-  
351 frequency coupling (Yeh et al. 2016; Lozano-Soldevilla et al. 2016). Occurrences of nonlinear signals in  
352 electrophysiology are increasingly recognized to be commonly present in physiological (Arroyo et al.  
353 1993; Gebber et al. 1999; Lozano-Soldevilla et al. 2016; Muthukumaraswamy et al. 2004) and  
354 pathological states (Cole et al. 2017). The physiological meaning of waveform shape, however, is still  
355 insufficiently understood (Cole and Voytek 2017).

356 The approach applied in this study utilizes the concept of recurrences in phase-space. The probability  
357 of a state recurrence as a function of its period has been previously introduced by Little et al. (2007).  
358 Our method builds upon this by also estimating amplitudes, i.e. energy content of a recurrence by  
359 estimating the phase-space volume of the recurrence. Additionally, by windowing the estimation  
360 procedure it is also possible to calculate a time-resolved recurrence amplitude spectrum, similar to  
361 short-time Fourier transform or wavelet analysis. The major difference to Fourier-based techniques is  
362 that time series are not fitted to basal waveforms in a “model-based” kind of way. Instead, it is  
363 quantified after what time the system reassumes a previous state, independent of the specific  
364 waveform in between these recurrences. Thus, as has been demonstrated in this study, simple  
365 asymmetric waveforms can be described more parsimoniously, without any spurious harmonics  
366 (Figure 5A-B). The most extreme example of this is a rhythmic idealized Dirac pulse, which has unity  
367 power over all frequencies in Fourier space (Beerends 2006), but can be parsimoniously represented  
368 with recurrence based methods. Thus, another possible application of our proposed method might be  
369 analysis of spike train or electromyography data (EMG). The problems regarding the analysis of the  
370 latter with Fourier-based methods is widely recognized, which is why EMG data is often additionally  
371 preprocessed by e.g. extracting the Hilbert envelope or taking the absolute value (Myers et al. 2003).  
372 These preprocessing steps may, however, lead to spurious results depending on further analysis  
373 (Negro et al. 2015; McClelland et al. 2012).

#### 374 *Parameters of recurrence analysis*

375 While the concept of recurrences in phase-space is well established in other scientific fields e.g.  
376 climatology (Beaufort et al. 2001), proteomics (Webber et al. 2001) or geology (Donner et al. 2019), it  
377 is still scarcely applied in neurosciences. Examples include classification of mild cognitive impairment  
378 (Timothy et al. 2017), multiple sclerosis (Carrubba et al. 2019) or emotional states (Khodabakhshi and  
379 Saba 2020). One possible reason for this might be the number of parameters which need to be  
380 adjusted. While the algorithm is not parametric, i.e. not model-based *per se*, the estimation procedure  
381 may be sensitive to several key parameters due to the finiteness of measured data. These most

382 prominently include the neighbourhood-size  $\epsilon$  and the embedding parameters  $d$  and  $\tau$ . For perfectly  
383 periodic recurrences and infinitely precise sampled data, the neighbourhood-size may be chosen  
384 arbitrarily small. However, for experimental data  $\epsilon$  should be ideally chosen to barely engulf most of  
385 recurrent states. If the neighbourhood-size is chosen too large, recurrence periods get underestimated  
386 for every multiple of the sampling frequency. If  $\epsilon$  is chosen slightly too small, recurrences might be  
387 missed. This may result in “harmonics”, i.e. multiples of recurrence periods appearing in the spectrum,  
388 as recurrences missed in one period might get detected in the next one (as can be seen in Figure 4).  
389 However, as our algorithm weights amplitudes by their probability of occurrences, few missed  
390 recurrences do not severely impact the overall spectrum. In the case that  $\epsilon$  is chosen much too small,  
391 all meaningful recurrences might be missed and the spectrum gets dominated by measurement noise.  
392 The choice of  $\epsilon$  thus depends on experimental data. However, it is important to note, that for real  
393 experimental data, there is no true neighbourhood-size as neural systems are hardly ever perfectly  
394 periodic. For intermediate ranges of  $\epsilon$  recurrence spectra are rather stable and frequencies should only  
395 slowly shift (Figure 4). Nevertheless, when reporting results, neighbourhood and embedding  
396 parameters should always be reported for reproducibility. One possible approach to optimise  
397 neighbourhood-size is to estimate the recurrence amplitude spectrum as a function of  $\epsilon$  and visually  
398 identify the noise regime for small neighbourhood-sizes (Figure 4). However, as this might be quite  
399 computationally demanding, it suffices to estimate the non-time resolved spectrum for a subsample  
400 of the data. This is justified if the variance of noise is static over time. The subset should be chosen  
401 long enough to cover the longest recurrence period of interest.

402 Of similar importance is an appropriate embedding of the measured data in phase-space. If the  
403 embedding dimension is too low, points which are far away from each other might get projected into  
404 close proximity. Thus, the time in between might be spuriously characterized as a specific recurrence  
405 period. On the other hand, if the embedding dimension is too high, estimation of recurrence periods  
406 becomes increasingly computational demanding and neighbouring points difficult to detect due to the  
407 increasing spaces between points otherwise known as “curse of dimensionality”. The embedding delay

408 is important for spreading out the phase-space volume. A delay which is too small would result in all  
409 points laying on the first intersect and thus no closed trajectories to measure. For our algorithm we  
410 used the well-established false-nearest neighbours algorithm (Hegger and Kantz 1999) for the  
411 optimization of the embedding dimension and the auto-mutual information (Fraser and Swinney  
412 1986). However, other techniques like e.g., the Ragwitz-algorithm are also frequently reported to  
413 optimize embedding parameters (Ragwitz and Kantz 2002; Michael Lindner et al. 2011; Weber et al.  
414 2020, supplementary methods). By automatically optimizing  $d$  and  $\tau$  we effectively eliminate these  
415 parameters, which makes the estimation procedure much easier to apply. This procedure is well  
416 established and implemented in many toolboxes utilizing the concept of phase-space analysis (Michael  
417 Lindner et al. 2011; Lizier 2014; Donges et al. 2015).

418 One limitation of the recurrence analysis is that it is by design not able to decompose a linear  
419 superposition of sine waves. For such artificially generated signals classic approaches are better suited.  
420 We thus propose to apply the demonstrated technique complementary in conjunction with classic  
421 approaches e.g. to discern possible spurious harmonics.

422

## 423 Conclusion

424 In this study, we introduced a new time-resolved technique to measure amplitudes of oscillatory  
425 signals in a waveform independent manner. This method estimates the energy of recurrent activity by  
426 measuring distances of closed trajectories in phase-space, which are subsequently weighted by their  
427 respective probability densities. Using artificial data, we demonstrate that the measure generates less  
428 spurious harmonics due to nonlinear waveform shapes in comparison to classic techniques like Fourier  
429 Transform. Further, the analysis of intracranial data of one epilepsy patient indicates that recurrence  
430 might be better suited to estimate high frequency activity than congenital methods, such as wavelet  
431 analysis or the Fourier transform. In addition, we show that recurrence analysis can be used to  
432 specifically analyse signals with defined waveform shapes. In summary, the proposed measure might

433 be well suited to complement classic frequency techniques, especially when the analysed signals are  
434 of nonlinear origin.

435 Code availability statement

436 All code used in this study is readily available at [https://nolitia.com/Code\\_recurrence\\_paper.zip](https://nolitia.com/Code_recurrence_paper.zip).

437

## 438 Literature

439 Agostina Palmigiano; Theo Geisel; Fred Wolf; Demian Battaglia (2017): Flexible information routing  
440 by transient synchrony. In *Nat Neurosci* 20 (7), pp. 1014–1022. DOI: 10.1038/nn.4569.

441 Amzica, F.; Steriade, M. (1998): Electrophysiological correlates of sleep delta waves. In  
442 *Electroencephalography and Clinical Neurophysiology* 107 (2), pp. 69–83. DOI: 10.1016/S0013-  
443 4694(98)00051-0.

444 Arroyo, Santiago; Lesser, Ronald P.; Gordon, Barry; Uematsu, Sumio; Jackson, Darryl; Webber, Robert  
445 (1993): Functional significance of the mu rhythm of human cortex: an electrophysiologic study with  
446 subdural electrodes. In *Electroencephalography and Clinical Neurophysiology* 87 (3), pp. 76–87. DOI:  
447 10.1016/0013-4694(93)90114-B.

448 Beaufort, L.; Garidel-Thoron, T. de; Mix, A. C.; Pisias, N. G. (2001): ENSO-like forcing on oceanic  
449 primary production during the Late Pleistocene. In *Science (New York, N.Y.)* 293 (5539), pp. 2440–  
450 2444. DOI: 10.1126/science.293.5539.2440.

451 Beerends, R. J. (2006): Fourier and Laplace transforms. Repr. Cambridge: Cambridge Univ. Press.  
452 Available online at <http://www.loc.gov/catdir/description/cam032/2003055187.html>.

453 Bollimunta, Anil; Mo, Jue; Schroeder, Charles E.; Ding, Mingzhou (2011): Neuronal mechanisms and  
454 attentional modulation of corticothalamic  $\alpha$  oscillations. In *The Journal of neuroscience : the official*  
455 *journal of the Society for Neuroscience* 31 (13), pp. 4935–4943. DOI: 10.1523/JNEUROSCI.5580-  
456 10.2011.

457 Buehlmann, Andres; Deco, Gustavo (2010): Optimal Information Transfer in the Cortex through  
458 Synchronization. In *PLoS Computational Biology* 6 (9). DOI: 10.1371/journal.pcbi.1000934.

459 Buzsáki, György; Draguhn, Andreas (2004): Neuronal oscillations in cortical networks. In *Science (New*  
460 *York, N.Y.)* 304 (5679), pp. 1926–1929. DOI: 10.1126/science.1099745.

461 Carrubba, Simona; Frilot, Clifton; Marino, Andrew A. (2019): Optimization of Recurrence  
462 Quantification Analysis for Detecting the Presence of Multiple Sclerosis. In *J. Med. Biol. Eng.* 39 (5),  
463 pp. 806–815. DOI: 10.1007/s40846-019-00462-1.

464 Cole, Scott R.; van der Meij, Roemer; Peterson, Erik J.; Hemptinne, Coralie de; Starr, Philip A.; Voytek,  
465 Bradley (2017): Nonsinusoidal Beta Oscillations Reflect Cortical Pathophysiology in Parkinson's  
466 Disease. In *The Journal of neuroscience : the official journal of the Society for Neuroscience* 37 (18),  
467 pp. 4830–4840. DOI: 10.1523/JNEUROSCI.2208-16.2017.

468 Cole, Scott R.; Voytek, Bradley (2017): Brain Oscillations and the Importance of Waveform Shape. In  
469 *Trends in cognitive sciences* 21 (2), pp. 137–149. DOI: 10.1016/j.tics.2016.12.008.

470 Crone, N. E.; Miglioretti, D. L.; Gordon, B.; Lesser, R. P. (1998): Functional mapping of human  
471 sensorimotor cortex with electrocorticographic spectral analysis. II. Event-related synchronization in

- 472 the gamma band. In *Brain : a journal of neurology* 121 (Pt 12), pp. 2301–2315. DOI:  
473 10.1093/brain/121.12.2301.
- 474 Debnath, Ranjan; Salo, Virginia C.; Buzzell, George A.; Yoo, Kathryn H.; Fox, Nathan A. (2019): Mu  
475 rhythm desynchronization is specific to action execution and observation: Evidence from time-  
476 frequency and connectivity analysis. In *NeuroImage* 184, pp. 496–507. DOI:  
477 10.1016/j.neuroimage.2018.09.053.
- 478 Donges, Jonathan F.; Heitzig, Jobst; Beronov, Boyan; Wiedermann, Marc; Runge, Jakob; Feng, Qing Yi  
479 et al. (2015): Unified functional network and nonlinear time series analysis for complex systems  
480 science: The pyunicorn package. In *Chaos* 25 (11), p. 113101. DOI: 10.1063/1.4934554.
- 481 Donner, Reik V.; Balasis, Georgios; Stolbova, Veronika; Georgiou, Marina; Wiedermann, Marc; Kurths,  
482 Jürgen (2019): Recurrence-Based Quantification of Dynamical Complexity in the Earth's  
483 Magnetosphere at Geospace Storm Timescales. In *J. Geophys. Res. Space Physics* 124 (1), pp. 90–108.  
484 DOI: 10.1029/2018JA025318.
- 485 Eckmann, J. P.; Kamphorst, S. O.; Ruelle, D. (1987): Recurrence plots of dynamical systems. In *EPL*  
486 (*Europhysics Letters*) (973).
- 487 Engel, Andreas K.; Fries, Pascal (2010): Beta-band oscillations--signalling the status quo? In *Current*  
488 *opinion in neurobiology* 20 (2), pp. 156–165. DOI: 10.1016/j.conb.2010.02.015.
- 489 Escobar Sanabria, David; Johnson, Luke A.; Nebeck, Shane D.; Zhang, Jianyu; Johnson, Matthew D.;  
490 Baker, Kenneth B. et al. (2017): Parkinsonism and vigilance: alteration in neural oscillatory activity  
491 and phase-amplitude coupling in the basal ganglia and motor cortex. In *Journal of neurophysiology*  
492 118 (5), pp. 2654–2669. DOI: 10.1152/jn.00388.2017.
- 493 Franaszczuk, P. J.; Blinowska, K. J. (1985): Linear model of brain electrical activity? EEG as a  
494 superposition of damped oscillatory modes. In *Biol. Cybern.* 53 (1), pp. 19–25. DOI:  
495 10.1007/BF00355687.
- 496 Fraser; Swinney (1986): Independent coordinates for strange attractors from mutual information. In  
497 *Physical review. A, General physics* 33 (2), pp. 1134–1140. DOI: 10.1103/physreva.33.1134.
- 498 Gebber, Gerard L.; Zhong, Sheng; Lewis, Craig; Barman, Susan M. (1999): Human brain alpha rhythm:  
499 nonlinear oscillation or filtered noise? In *Brain Research* 818 (2), pp. 556–560. DOI: 10.1016/S0006-  
500 8993(98)01303-1.
- 501 Grubov, V. V.; Sitnikova, E.; Pavlov, A. N.; Koronovskii, A. A.; Hramov, A. E. (2017): Recognizing of  
502 stereotypic patterns in epileptic EEG using empirical modes and wavelets. In *Physica A* 486 (8),  
503 pp. 206–217. DOI: 10.1016/j.physa.2017.05.091.
- 504 Hegger, R.; Kantz, H. (1999): Improved false nearest neighbor method to detect determinism in time  
505 series data. In *Physical review. E, Statistical physics, plasmas, fluids, and related interdisciplinary*  
506 *topics* 60 (4 Pt B), pp. 4970–4973. DOI: 10.1103/physreve.60.4970.
- 507 Hemptinne, Coralie de; Ryapolova-Webb, Elena S.; Air, Ellen L.; Garcia, Paul A.; Miller, Kai J.;  
508 Ojemann, Jeffrey G. et al. (2013): Exaggerated phase-amplitude coupling in the primary motor cortex  
509 in Parkinson disease. In *Proceedings of the National Academy of Sciences of the United States of*  
510 *America* 110 (12), pp. 4780–4785. DOI: 10.1073/pnas.1214546110.
- 511 Hramov, Alexander E.; Koronovskii, Alexey A.; Makarov, Valeri A.; Pavlov, Alexey N.; Sitnikova,  
512 Evgenia (2015): Wavelets in Neuroscience. Berlin, Heidelberg: Springer Berlin Heidelberg.
- 513 Jones, Stephanie R. (2016): When brain rhythms aren't 'rhythmic': implication for their mechanisms  
514 and meaning. In *Current opinion in neurobiology* 40, pp. 72–80. DOI: 10.1016/j.conb.2016.06.010.



- 515 Jurkiewicz, Michael T.; Gaetz, William C.; Bostan, Andreea C.; Cheyne, Douglas (2006): Post-  
516 movement beta rebound is generated in motor cortex: evidence from neuromagnetic recordings. In  
517 *NeuroImage* 32 (3), pp. 1281–1289. DOI: 10.1016/j.neuroimage.2006.06.005.
- 518 Khodabakhshi, Mohammad Bagher; Saba, Valiollah (2020): A nonlinear dynamical approach to  
519 analysis of emotions using EEG signals based on the Poincaré map function and recurrence plots. In  
520 *Biomedizinische Technik. Biomedical engineering*. DOI: 10.1515/bmt-2019-0121.
- 521 Kühn, Andrea A.; Kupsch, Andreas; Schneider, Gerd-Helge; Brown, Peter (2006): Reduction in  
522 subthalamic 8-35 Hz oscillatory activity correlates with clinical improvement in Parkinson's disease. In  
523 *The European journal of neuroscience* 23 (7), pp. 1956–1960. DOI: 10.1111/j.1460-  
524 9568.2006.04717.x.
- 525 Leszczyński, Marcin; Barczak, Annamaria; Kajikawa, Yoshinao; Ulbert, Istvan; Falchier, Arnaud Y.; Tal,  
526 Idan et al. (2020): Dissociation of broadband high-frequency activity and neuronal firing in the  
527 neocortex. In *Sci. Adv.* 6 (33), eabb0977. DOI: 10.1126/sciadv.abb0977.
- 528 Lewis, Laura D.; Weiner, Veronica S.; Mukamel, Eran A.; Donoghue, Jacob A.; Eskandar, Emad N.;  
529 Madsen, Joseph R. et al. (2012): Rapid fragmentation of neuronal networks at the onset of propofol-  
530 induced unconsciousness. In *Proceedings of the National Academy of Sciences of the United States of*  
531 *America* 109 (49), E3377-86. DOI: 10.1073/pnas.1210907109.
- 532 Little, Max A.; McSharry, Patrick E.; Roberts, Stephen J.; Costello, Declan A. E.; Moroz, Irene M.  
533 (2007): Exploiting nonlinear recurrence and fractal scaling properties for voice disorder detection. In  
534 *Biomedical engineering online* 6, p. 23. DOI: 10.1186/1475-925X-6-23.
- 535 Little, Simon; Brown, Peter (2014): The functional role of beta oscillations in Parkinson's disease. In  
536 *Parkinsonism & Related Disorders* 20, S44-S48. DOI: 10.1016/S1353-8020(13)70013-0.
- 537 Lizier, Joseph T. (2014): JIDT: An Information-Theoretic Toolkit for Studying the Dynamics of Complex  
538 Systems. In *Front. Robot. AI* 1. DOI: 10.3389/frobt.2014.00011.
- 539 Lorenz, Edward N. (1963): Deterministic Nonperiodic Flow. In *J. Atmos. Sci.* 20 (2), pp. 130–141. DOI:  
540 10.1175/1520-0469(1963)020<0130:DNF>2.0.CO;2.
- 541 Lozano-Soldevilla, Diego; Ter Huurne, Niels; Oostenveld, Robert (2016): Neuronal Oscillations with  
542 Non-sinusoidal Morphology Produce Spurious Phase-to-Amplitude Coupling and Directionality. In  
543 *Frontiers in computational neuroscience* 10, p. 87. DOI: 10.3389/fncom.2016.00087.
- 544 McClelland, Verity M.; Cvetkovic, Zoran; Mills, Kerry R. (2012): Rectification of the EMG is an  
545 unnecessary and inappropriate step in the calculation of Corticomuscular coherence. In *Journal of*  
546 *Neuroscience Methods* 205 (1), pp. 190–201. DOI: 10.1016/j.jneumeth.2011.11.001.
- 547 Michael Lindner; Raul Vicente; Viola Priesemann; Michael Wibral (2011): TRENTOOL: A Matlab open  
548 source toolbox to analyse information flow in time series data with transfer entropy. In *BMC*  
549 *Neurosci* 12 (1), pp. 1–22. DOI: 10.1186/1471-2202-12-119.
- 550 Miller, Kai J.; Leuthardt, Eric C.; Schalk, Gerwin; Rao, Rajesh P. N.; Anderson, Nicholas R.; Moran,  
551 Daniel W. et al. (2007): Spectral changes in cortical surface potentials during motor movement. In  
552 *The Journal of neuroscience : the official journal of the Society for Neuroscience* 27 (9), pp. 2424–  
553 2432. DOI: 10.1523/JNEUROSCI.3886-06.2007.
- 554 Milton, John G. (1994): Wavelet transforms and surrogate data for electroencephalographic spike  
555 and seizure localization. In *Opt. Eng* 33 (7), p. 2162. DOI: 10.1117/12.172248.

- 556 Muthukumaraswamy, Suresh D.; Johnson, Blake W.; McNair, Nicolas A. (2004): Mu rhythm  
557 modulation during observation of an object-directed grasp. In *Brain research. Cognitive brain*  
558 *research* 19 (2), pp. 195–201. DOI: 10.1016/j.cogbrainres.2003.12.001.
- 559 Myers, L.J.; Lowery, M.; O'Malley, M.; Vaughan, C.L.; Heneghan, C.; St Clair Gibson, A. et al. (2003):  
560 Rectification and non-linear pre-processing of EMG signals for cortico-muscular analysis. In *Journal of*  
561 *Neuroscience Methods* 124 (2), pp. 157–165. DOI: 10.1016/S0165-0270(03)00004-9.
- 562 Negro, Francesco; Keenan, Kevin; Farina, Dario (2015): Power spectrum of the rectified EMG: when  
563 and why is rectification beneficial for identifying neural connectivity? In *Journal of neural engineering*  
564 12 (3). DOI: 10.1088/1741-2560/12/3/036008.
- 565 Oostenveld, Robert; Fries, Pascal; Maris, Eric; Schoffelen, Jan-Mathijs (2011): FieldTrip: Open source  
566 software for advanced analysis of MEG, EEG, and invasive electrophysiological data. In  
567 *Computational intelligence and neuroscience* 2011, p. 156869. DOI: 10.1155/2011/156869.
- 568 Parkes, Laura M.; Bastiaansen, Marcel C.M.; Norris, David G. (2006): Combining EEG and fMRI to  
569 investigate the post-movement beta rebound. In *NeuroImage* 29 (3), pp. 685–696. DOI:  
570 10.1016/j.neuroimage.2005.08.018.
- 571 Pedrosa, David J.; Reck, Christiane; Florin, Esther; Pauls, K. Amande M.; Maarouf, Mohammad;  
572 Wojtecki, Lars et al. (2012): Essential tremor and tremor in Parkinson's disease are associated with  
573 distinct 'tremor clusters' in the ventral thalamus. In *Experimental neurology* 237 (2), pp. 435–443.  
574 DOI: 10.1016/j.expneurol.2012.07.002.
- 575 Pfurtscheller, G.; Da Lopes Silva, F. H. (1999): Event-related EEG/MEG synchronization and  
576 desynchronization: basic principles. In *Clinical Neurophysiology* 110 (11), pp. 1842–1857. DOI:  
577 10.1016/S1388-2457(99)00141-8.
- 578 Pullon, Rebecca M.; McCabe, Samuel; Gaskell, Amy; Sleight, Jamie W. (2019): Non-sinusoidal waves in  
579 the EEG and their simulated effect on anaesthetic quantitative EEG monitors. In *J Clin Monit Comput*  
580 33 (6), pp. 1089–1096. DOI: 10.1007/s10877-019-00254-7.
- 581 Ragwitz, M.; Kantz, H. (2002): Markov models from data by simple nonlinear time series predictors in  
582 delay embedding spaces. In *PHYSICAL REVIEW E* 6505 (5), p. 6201.
- 583 Salmelin, R.; Hämäläinen, M.; Kajola, M.; Hari, R. (1995): Functional segregation of movement-related  
584 rhythmic activity in the human brain. In *NeuroImage* 2 (4), pp. 237–243. DOI:  
585 10.1006/nimg.1995.1031.
- 586 Schnitzler, Alfons; Münsks, Christian; Butz, Markus; Timmermann, Lars; Gross, Joachim (2009):  
587 Synchronized brain network associated with essential tremor as revealed by  
588 magnetoencephalography. In *Movement disorders : official journal of the Movement Disorder Society*  
589 24 (11), pp. 1629–1635. DOI: 10.1002/mds.22633.
- 590 Sherman, Maxwell A.; Lee, Shane; Law, Robert; Haegens, Saskia; Thorn, Catherine A.; Hämäläinen,  
591 Matti S. et al. (2016): Neural mechanisms of transient neocortical beta rhythms: Converging evidence  
592 from humans, computational modeling, monkeys, and mice. In *Proceedings of the National Academy*  
593 *of Sciences of the United States of America* 113 (33), E4885-94. DOI: 10.1073/pnas.1604135113.
- 594 Takens, Floris. (1981): Dynamical systems and turbulence. Detecting strange attractors in turbulence.  
595 Berlin, Heidelberg: Springer.
- 596 Tiihonen, J.; Kajola, M.; Hari, R. (1989): Magnetic mu rhythm in man. In *Neuroscience* 32 (3), pp. 793–  
597 800. DOI: 10.1016/0306-4522(89)90299-6.

- 598 Timothy, Leena T.; Krishna, Bindu M.; Nair, Usha (2017): Classification of mild cognitive impairment  
599 EEG using combined recurrence and cross recurrence quantification analysis. In *International journal*  
600 *of psychophysiology : official journal of the International Organization of Psychophysiology* 120,  
601 pp. 86–95. DOI: 10.1016/j.ijpsycho.2017.07.006.
- 602 Tzourio-Mazoyer, N.; Landeau, B.; Papathanassiou, D.; Crivello, F.; Etard, O.; Delcroix, N. et al. (2002):  
603 Automated Anatomical Labeling of Activations in SPM Using a Macroscopic Anatomical Parcellation  
604 of the MNI MRI Single-Subject Brain. In *NeuroImage* 15 (1), pp. 273–289. DOI:  
605 10.1006/nimg.2001.0978.
- 606 van Drongelen, Wim (2018): Signal processing for neuroscientists. Second edition. London: Elsevier,  
607 Academic Press.
- 608 van Vugt, Marieke K.; Sederberg, Per B.; Kahana, Michael J. (2007): Comparison of spectral analysis  
609 methods for characterizing brain oscillations. In *Journal of Neuroscience Methods* 162 (1-2), pp. 49–  
610 63. DOI: 10.1016/j.jneumeth.2006.12.004.
- 611 Webber, C. L.; Giuliani, A.; Zbilut, J. P.; Colosimo, A. (2001): Elucidating protein secondary structures  
612 using alpha-carbon recurrence quantifications. In *Proteins* 44 (3), pp. 292–303. DOI:  
613 10.1002/prot.1094.
- 614 Webber, Charles L.; Marwan, Norbert (2015): Recurrence Quantification Analysis. Cham: Springer  
615 International Publishing.
- 616 Weber, Immo; Florin, Esther; Papen, Michael von; Visser-Vandewalle, Veerle; Timmermann, Lars  
617 (2020): Characterization of information processing in the subthalamic area of Parkinson's patients. In  
618 *NeuroImage* 209, p. 116518. DOI: 10.1016/j.neuroimage.2020.116518.
- 619 Yeh, Chien-Hung; Lo, Men-Tzung; Hu, Kun (2016): Spurious cross-frequency amplitude-amplitude  
620 coupling in nonstationary, nonlinear signals. In *Physica A* 454, pp. 143–150. DOI:  
621 10.1016/j.physa.2016.02.012.
- 622 Zhang, Zitong; Telesford, Qawi K.; Giusti, Chad; Lim, Kelvin O.; Bassett, Danielle S. (2016): Choosing  
623 Wavelet Methods, Filters, and Lengths for Functional Brain Network Construction. In *PLoS ONE* 11  
624 (6), e0157243. DOI: 10.1371/journal.pone.0157243.
- 625
